# Supplementary material for: A light-driven photosynthetic microbial fuel cell for carbon-negative bioelectricity production
Source: Royal Society of Chemistry journal article supplement (doi:10.1039/d3se01487h), 2024-01-01
Supplement: d3se01487h1.pdf [file d3se01487h1.pdf]

Date: March 29<sup>th</sup>, 2024

For submission to *Sustainable Energy & Fuels*

## Supporting information

# Light-driven photosynthetic microbial fuel cell for carbon negative bioelectricity production

Won Gyeong Park<sup>a</sup>, Minsoo Kim<sup>a</sup>, Shuwei Li<sup>a</sup>, Eunseo Kim<sup>a</sup>, Eun Joo Park<sup>a</sup>, Jiin Yoo<sup>a</sup>

Nagesh Maile<sup>a,c</sup>, Jungho Jae<sup>a,c</sup>, Hyoung-il Kim<sup>b</sup>, Jung Rae Kim<sup>a,c,\*</sup>

<sup>a</sup> School of Chemical Engineering, Pusan National University, Busan, 46241, Republic of Korea

<sup>b</sup> School of Civil & Environmental Engineering, Yonsei University, Seoul, 03722, Republic of Korea

<sup>c</sup> Institute for Environmental Energy, Pusan National University, Busan, 46241, Republic of Korea

**Running title:** Bioelectricity production of PMFC with carbon-negative process

### Corresponding author:

Prof. Jung Rae Kim

School of Chemical and Biomolecular Engineering,  
Pusan National University, Busan 46241, Republic of Korea

E-mail address: [j.kim@pusan.ac.kr](mailto:j.kim@pusan.ac.kr) (J. R. Kim)

Phone: +82.51.510.2393, Fax: +82.51.510.3943

## NGS Analysis

After sequencing was completed, Illumina MiSeq raw data was classified by sample using an index sequence, and a paired-end FASTQ file was created for each sample. Cutadapt program was used to remove the sequencing adapter sequence and the F/R primer sequence of the target gene region <sup>1</sup>. In order to correct errors in the Amplicon sequencing process, the R(v4.0.3) [DADA2(v1.18.0)] of the program was used <sup>2</sup>. For paired-end reads, the forward sequence Read1 and the reverse sequence Read2 were cut to 250 bp and 200 bp, respectively, and sequences with an expected error of 2 or more were excluded. After that, the error model for each batch was established and the noise for each sample was removed. After assembling the paired-end sequences with the corrected sequencing error into one sequence, the Consensus method of DADA2 was used to remove the Chimera sequence and formed ASVs. In addition, for comparative analysis of microbial community, QIIME (v1.9) program was used to normalize by applying subsampling based on the number of reads of the sample with the minimum number of reads among all samples <sup>3</sup>. For each ASVs sequence, BLAST+(v2.9.0) was performed in the Reference DB (NCBI 16S Microbial DB), and taxonomy information was assigned to the organism of the subject with the highest similarity <sup>4</sup>. If less than 85% or the identity of the matched domain is less than 85%, taxonomy information is not assigned.

**Fig S1**

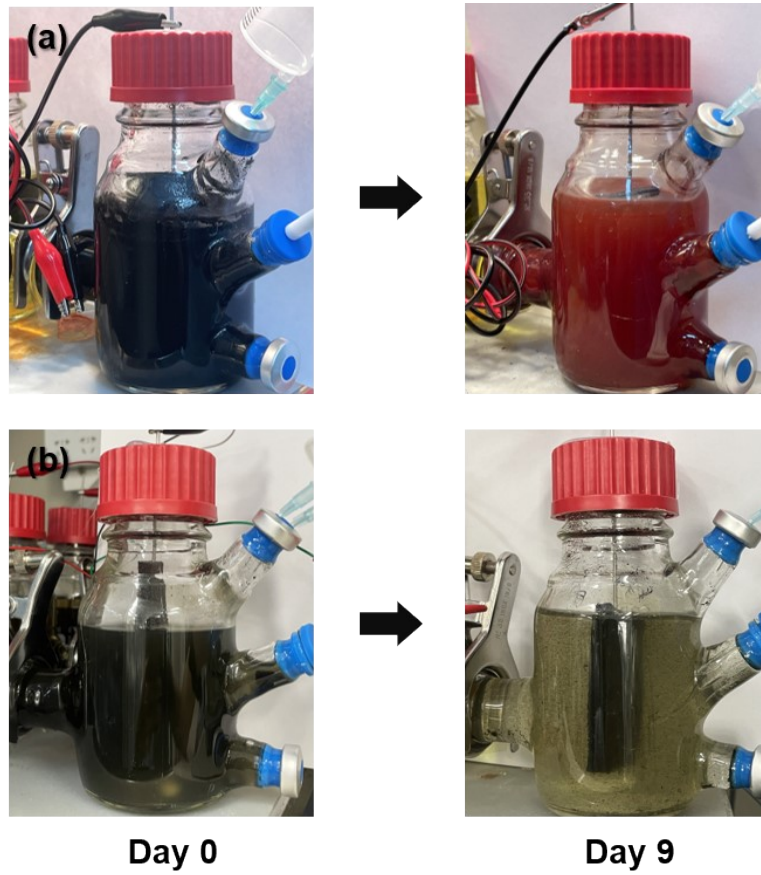

Fig S1. Color change of anolyte in (a) P-MFC, and (b) D-MFC after the enrichment phase. The red color of P-MFC became more thicker as the medium was replaced.

**Fig S2**

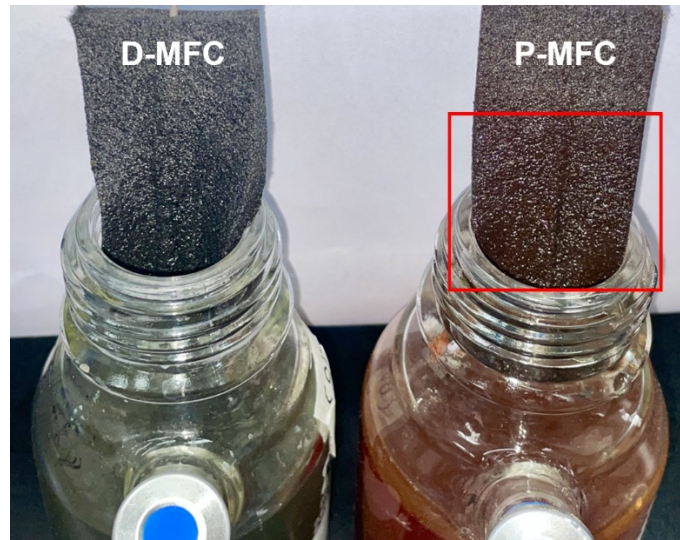

Fig S2. Color change of anode in P-MFC compared to D-MFC after the enrichment phase. It was remained until end of the operation.

**Fig S3**

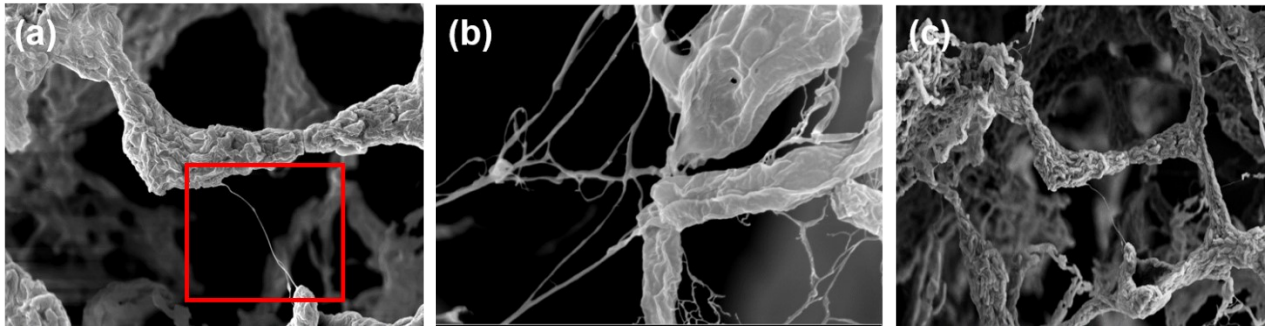

Fig S3. (a, b) Morphology of anode-attached cell of P-MFC in high magnification, and (c) low magnification. Red box indicates nanowire-like structure between cells which can be a function of interspecies electron transfer (IET).

## Reference

1. M. Martin, *EMBnet. journal*, 2011, **17**, 10-12.
2. B. J. Callahan, P. J. McMurdie, M. J. Rosen, A. W. Han, A. J. A. Johnson and S. P. Holmes, *Nature methods*, 2016, **13**, 581-583.
3. J. G. Caporaso, J. Kuczynski, J. Stombaugh, K. Bittinger, F. D. Bushman, E. K. Costello, N. Fierer, A. G. Peña, J. K. Goodrich and J. I. Gordon, *Nature methods*, 2010, **7**, 335-336.
4. C. Camacho, G. Coulouris, V. Avagyan, N. Ma, J. Papadopoulos, K. Bealer and T. L. Madden, *BMC bioinformatics*, 2009, **10**, 1-9.
